# Supplementary material
Source: HighWire-hosted journal article supplement (https://cmaj.ca/highwire/filestream/58092/field_highwire_adjunct_files/0/hyp-egeland-1-at.pdf)
Supplement: hyp-egeland-1-at.pdf [file hyp-egeland-1-at.pdf]

Appendix 1 (as submitted by the authors): Canadian Inuit Nunangat (Homeland): Three of four land-claim areas included in the survey of 2007-2008: Inuvialuit Settlement Region, Nunavut, and Nunatsiavut Region.

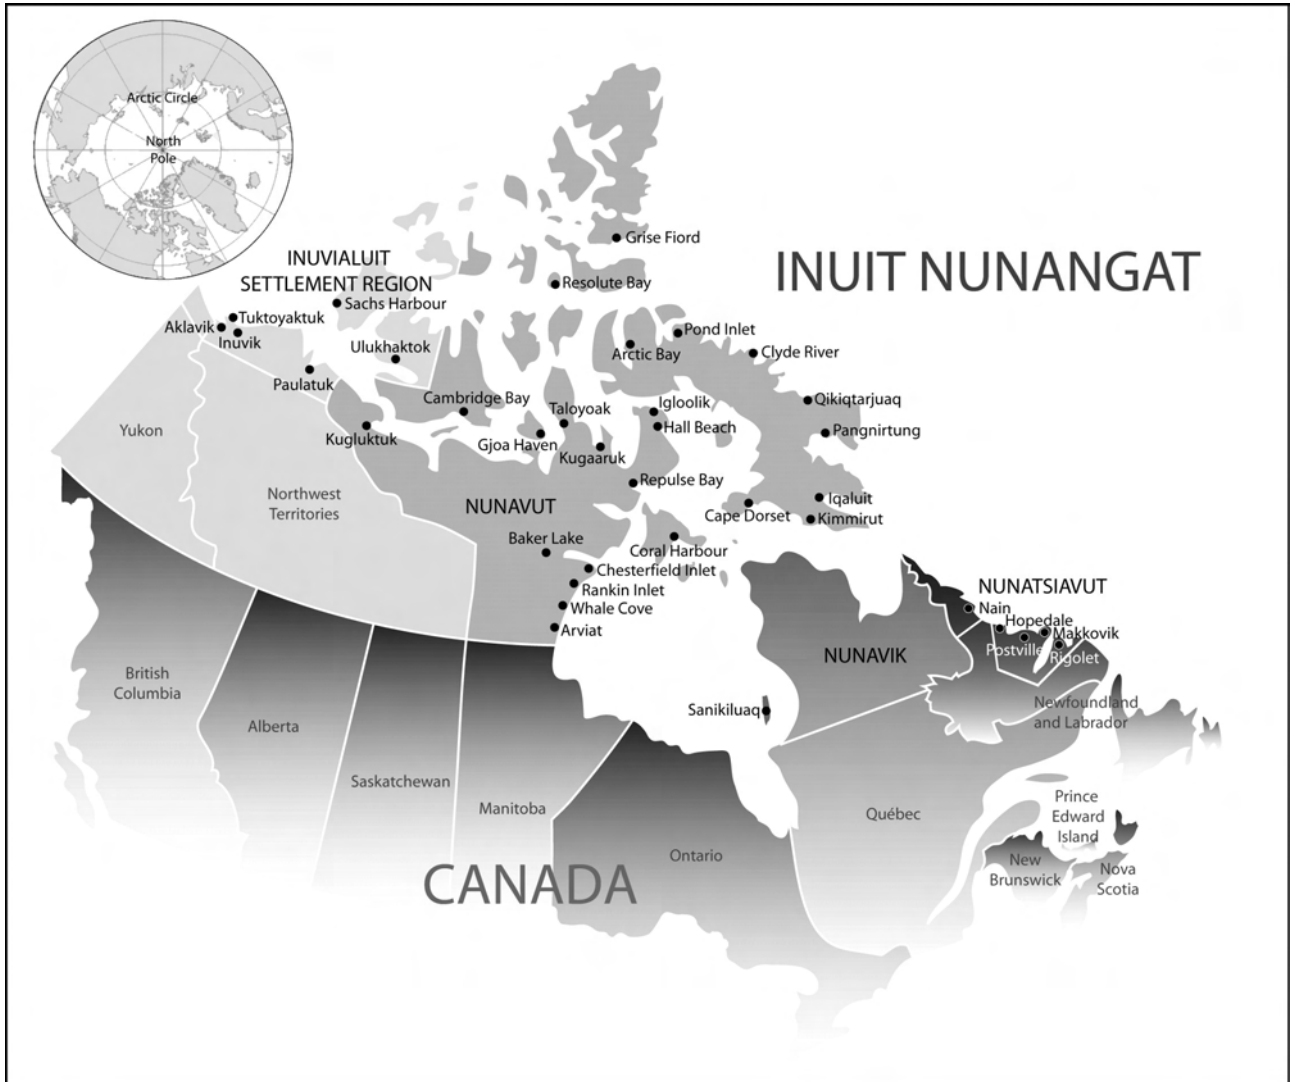

**Appendix to:** Egeland GM, Cao Z, Young TK. Hypertriglyceridemic-waist phenotype and glucose intolerance among Canadian Inuit: the International Polar Year Inuit Health Survey for Adults 2007–2008. *CMAJ* 2010. DOI:10.1503/cmaj.101801.

Copyright © 2011, Canadian Medical Association or its licensors
